# Supplementary material
Source: publisher figshare collection journal article supplement (https://frontiersin.figshare.com/ndownloader/files/22413981)
Supplement: Supplementary file [file 22413981]

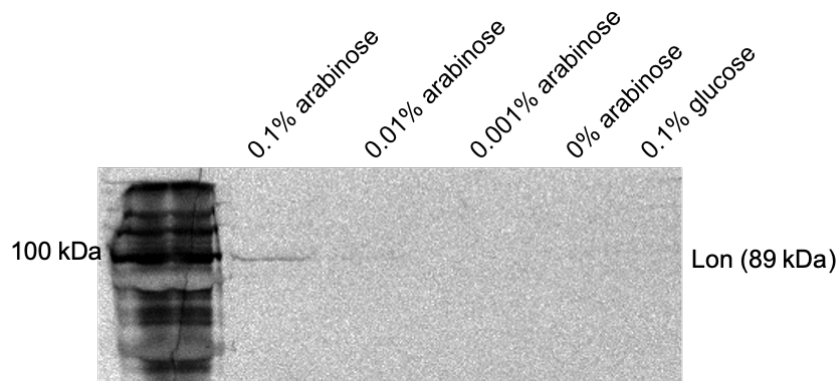

**Supp. Figure 4: Western blot of arabinose-inducible  $\Delta lon::LON$  *K. pneumoniae* strain.** The  $\Delta lon$  strain was transformed with a His-tagged LON protein under induction with arabinose. The western blot shows production of Lon protease (89 kDa) with 0.1% arabinose and a lower production at 0.01% arabinose. Lon protease production is undetectable with 0.001% arabinose, 0% arabinose, or 0.1% glucose, confirming production of the protein under the specified conditions. All subsequent experiments using the  $\Delta lon::LON$  strain were performed in 0.1% arabinose.
